# Supplementary material
Source: PubMed Central journal article supplement (PMC2493457)
Supplement: fj.07-104455_1.pdf [file fj.07-104455_1.pdf]

Isabel Tapia Paez, Kristiina Tammimies, Satu Massinen, Ananda L. Roy and Juha Kere

The complex of TFII-I, PARP1 and SFPQ proteins regulates the *DYX1C1* gene implicated in neuronal migration and  
Dyslexia

**Supplementary Data File**

## MS-Digest Search Results

Masses from in gel digestion MS are shown in red

Short Peptide sequences identified by MS/MS qTOF are underlined

Acc P09874 Poly [ADP-ribose] polymerase 1, Protein MW: 11308

|     |            |             |            |            |             |            |            |            |
|-----|------------|-------------|------------|------------|-------------|------------|------------|------------|
| 1   | MAESSDKLYR | VEYAKSGRAS  | CKKCESEIPK | DSLRLAIMVQ | SPMFDGKVPH  | WYHFSFCWKV | GHSIRHPDVE | VDGFSELRWD |
| 81  | DQQKVKKTAE | AGGVVTGKGQD | GIGSKAEKTL | GDFAAEYAKS | NRSTCKGCME  | KIEKGQVRLS | KKMVDPEKPO | LGMIDRWYHP |
| 161 | GCFVKNREEL | GFRPEYSASQ  | LKGFSLATE  | DKEALKKQLP | GVKSEGKRKG  | DEVGDVDEVA | KKKSKKEKDK | DSKLEKALKA |
| 241 | QNDLIWNIKD | ELKKVCSTND  | LKELLIFNKQ | QVPSGESAIL | DRVADGMVFG  | ALLPCEECSE | QLVFKSDAYY | CTGDVTAATK |
| 321 | CMVKTQTPNR | KEWVTPKEFR  | EISYLKCLKV | KKQDRIFPPE | TSASVAATPP  | PSTASAPAAV | NSSASADKPL | SNMKILTLGK |
| 401 | LSRNKDEVKA | MIKLGGLT    | GTANKASLCI | STKKEVEKMN | KKMEEVKEAN  | IRVVEDFLQ  | DVSASTKSLQ | ELFLAHILSP |
| 481 | WGAEVKAEPV | EVVAPRGKSG  | AALSCKSKGQ | VKEEGINKSE | KRMKLTLLKGG | AAVDPDGSLG | HSAHVLEKGG | KVFSATLGLV |
| 561 | DIVKGTNSYY | KLQLEDDKE   | NRYWIFRSWG | RVGTVIGSNK | LEQMPSKEDA  | IEHFMKLYEE | KTGNAWHSKN | FTKYPKKFYP |
| 641 | LEIDYGDDEE | AVKKLTVNPG  | TKSKLKPVPQ | DLIKMIFDVE | SMKKAMVEYE  | IDLQKMPGK  | LSKRQIQAAV | SILSEVQQAV |
| 721 | SQGSSDSQIL | DLSNRFYTLI  | PHDFGMKPP  | LLNNADSVQA | KVEMLDNLLD  | IEVAYSLLRG | GSDDSSKDP  | DVNYEKLKTD |
| 801 | IKVVDRDSEE | AEIIRKYVKN  | THATTHNAYD | LEVIDIFKIE | REGECQRYKP  | FKQLHNRLL  | WHGSRTTNFA | GILSQGLRIA |
| 881 | PPEAPVTGYM | FGKGIYFADM  | VSKSANYCHT | SQGDPIGLIL | LGEVALGNMY  | ELKHASHISK | LPKGKHSVKG | LGKTTDPDSA |
| 961 | NISLDGVDVP | LGTGISSGVN  | DTSLLYNEYI | VYDIAQVNLK | YLLKLFNFK   | TSLW       |            |            |

Acc P23246 Splicing Factor, Proline- and Glutamine-rich SFPQ (PTB-associated-splicing factor) (PSF) Protein MW: 76150

|     |            |             |            |            |            |            |            |             |
|-----|------------|-------------|------------|------------|------------|------------|------------|-------------|
| 1   | MSRDRFRSRG | GGGGGFHRRG  | GGGGRGGLHD | FRSPPPGMGL | NQNRGPMGPG | PGQSGPKPPI | PPPPPHQQQQ | QPPPPQPPPPQ |
| 81  | QPPPHQPPPH | PQPHQQQPP   | PPPQDSSKPV | VAQGGPAPAG | VGSAPPASS  | APPATPPTSG | APPGSGPGPT | PTPPPAV TSA |
| 161 | PPGAPPPTPP | SSGVPTTPPQ  | AGGPPPPAA  | VPGGPGPKQ  | GPGGGPKGG  | KMPGGPKPGG | GPGLSTPGGH | PKPPHRGGGE  |
| 241 | PRGGRQHHP  | YHQHHQGGP   | PGGGGRSEE  | KISDSEGFKA | NLSLLRRPGE | KTYTQRCRLF | VGNLPADITE | DEFKRLFAKY  |
| 321 | GEPGEVFIN  | GKGFIFIKLE  | SRALAEIAKA | ELDDTPMRGR | QLRVRFATHA | AALSVRNLS  | YVSNELLEEA | FSQFGPIERA  |
| 401 | VVIVDDRGRS | TGKGIVEFAS  | KPAARKAFER | CSEGVFLLTT | TPRPVIVEPL | EQLDDEDGLP | EKLAQKNPMY | QKERETPPRF  |
| 481 | AQHGTFEY   | SQRWKSLEDEM | EKQREQVEK  | NMKDAKDKLE | SEMEDAYHEH | QANLLRQDLM | RRQEELRME  | ELHNQEMQKR  |
| 561 | KEMQLRQEEE | RRRREEMMI   | RQREMEEQMR | RQREESYSRM | GYMDPRERDM | RMGGGGAMNM | GDPYGGGQK  | FPPLGGGGGI  |
| 641 | GYEANPGVPP | ATMSGSMMS   | DMRTERFGQG | GAGPVGQGP  | RGMGPGTPAG | YGRGREEYEG | PNKKPRF    |             |

Acc P78347 General transcription factor II-I, GTFII-I, TFII-I (Bruton tyrosine kinase-associated protein 135) (Williams-Beuren syndrome chromosome region), Protein MW: 112417

|     |             |            |            |             |             |             |            |            |
|-----|-------------|------------|------------|-------------|-------------|-------------|------------|------------|
| 1   | MAQVAMSTLP  | VEDESSER   | MVVTFLMSAL | ESMCKELAKS  | KAEVACIAVY  | ETDVFVVGTE  | RGRAFVNTRK | DFQKDFVKYC |
| 81  | VEEEKAEM    | HMKSTTQAN  | RMSVDAVEIE | TLRKTVEDYF  | CFCYGKALGK  | STVVPVPEK   | MLRDQSAVVV | QGLPEGVAFK |
| 161 | HPENYDLATL  | KWILENKAGI | SFIKRPFLE  | KHVGGVRM    | VTDADR SILS | PGGSCGPIKV  | KTEPTEDSGI | SLEMAAVTVK |
| 241 | EESEDPDYYQ  | YNIQAGPSET | DDVDEKQPLS | KPLQGS SHSS | EGNEGTEMEV  | PAEDSTQHVP  | SETSEDPEVE | VTIEDDDYSP |
| 321 | PSKRPKANEL  | PQPPVPEPAN | AGKRKVREFN | FEKWNARITD  | LRKQVEELFE  | RKYAQAIKAK  | GPVTIPYPLF | QSHVEDLYVE |
| 401 | GLPEGIPFRR  | PSTYGIPRLE | RILLAKERIR | FVIKKHELLN  | STREDLQLDK  | PASGVKEEWY  | ARITKLRKMV | DQLFCCKFAE |
| 481 | ALGSTEA KAV | PYQKFEAHPN | DLYVEGLPEN | IPFRSPSWYG  | IPRLEKIQV   | GNRIKFVIKR  | PELLTHSTTE | VTQPRTNTPV |
| 561 | KEDWNV RITK | LRKQVEEIFN | LKFAQALGLT | EAVKVPYPVF  | ESNPEFLYVE  | GLPEGIPFRS  | PTWFGIPRLE | RIVRGSNKIK |
| 641 | FVVKPELVI   | SYLPPGMASK | INTKALQSPK | RPRSPGSNSK  | VPEIEVTVEG  | PNNNNPQ TSA | VRTPTQTNGS | NVPFKPRGRE |
| 721 | FSFEAWN AKI | TDLKQKVENL | FNEKCGEALG | LKQAVKVPFA  | LFESFPEDFY  | VEGLPEGVPF  | RRPSTFGIPR | LEKILRNKAK |
| 801 | IKFIIKPEM   | FETAIKESTS | SKSPRKINS  | SPNVNTTASG  | VEDLNIIQVT  | IPDDDNERLS  | KVEKARQLRE | QVNDLFSRK  |
| 881 | GEAIGMGFPV  | KVPYRKITIN | PGCVVDGMP  | PGVSFKAPSY  | LEISSMRIL   | DSAEFIKFTV  | IRFPGLVIN  | NQLVDQSESE |
| 961 | GPVIQESAEP  | SQLEVPATEE | IKETDGSSQI | KQEPDPTW    |             |             |            |            |

## MS-Fit results upper band

21/38 matches (55%) **Blue** Acc P09874 Poly [ADP-ribose] polymerase 1 (PARP-1) (ADPRT) (NAD(+) ADP-ribosyltransferase 1)  
 Index: 138653 MW: 113085 Da  
 pl: 9.0  
 10/38 matches (26%) **Red** Acc P78347 General transcription factor II-I (GTFII-I)  
 Index: 78631 MW: 112417 Da (Bruton tyrosine kinase-associated protein 135)(Williams-Beuren syndrome region)  
 pl: 6.1

| m/z Submitted Mass value [H+] | MH+ Matched | Delta Da | Modifications | Start | End | Missed Cleavages | Sequence                     |
|-------------------------------|-------------|----------|---------------|-------|-----|------------------|------------------------------|
| 784.412012                    | 784.4141    | -0.0021  |               | 583   | 587 | 0                | (R) YWIFR (S)                |
| 800.375467                    |             |          |               |       |     |                  |                              |
| 816.407432                    |             |          |               |       |     |                  |                              |
| 819.411271                    | 819.3632    | 0.048    |               | 79    | 84  | 0                | (R) WDDQKQ (V)               |
| 853.387985                    | 853.3839    | 0.0041   |               | 457   | 462 | 0                | (K) EEWYAR (I)               |
| 868.468917                    | 868.4788    | -0.0099  |               | 859   | 865 | 0                | (R) LLWHGSR (T)              |
| 900.449751                    | 900.4322    | 0.018    |               | 622   | 629 | 0                | (K) TGNAWHSK (N)             |
| 996.490005                    |             |          |               |       |     |                  |                              |
| 1030.567024                   | 1030.5792   | -0.012   |               | 782   | 790 | 0                | (R) RPSTFGIPR (L)            |
| 1049.528843                   | 1049.5262   | 0.0026   |               | 364   | 371 | 0                | (K) QVEELFER (K)             |
| 1060.549799                   | 1060.5574   | -0.0076  |               | 620   | 628 | 0                | (R) SPTWFGIPR (L)            |
|                               | 1060.6626   | -0.11    |               | 427   | 434 | 2                | (K) ERIRFVIK (K)             |
| 1061.539657                   | 1061.5109   | 0.029    |               | 807   | 815 | 0                | (R) DSEEAEIIR (K)            |
| 1064.529731                   | 1064.5405   | -0.011   |               | 254   | 262 | 1                | (K) KVCSTNDLK (E)            |
| 1092.535279                   | 1092.5208   | 0.014    |               | 788   | 796 | 0                | (K) DPIDVNYEK (L)            |
| 1107.535687                   | 1107.5429   | -0.0072  |               | 870   | 878 | 0                | (R) EQVNDLFSR (K)            |
| 1118.525009                   | 1118.6092   | -0.084   |               | 131   | 140 | 0                | (K) STVVPVPYEK (M)           |
| 1130.540423                   | 1130.5551   | -0.015   |               | 894   | 903 | 0                | (K) GIYFADMVSK (S)           |
| 1185.577210                   | 1185.5786   | -0.0014  |               | 109   | 119 | 0                | (K) TLGDFAAEYAK (S)          |
| 1193.592242                   | 1193.5561   | 0.036    |               | 157   | 165 | 0                | (R) WYHPGCFVK (N)            |
| 1193.5922                     | 1193.6235   | -0.031   |               | 807   | 816 | 0                | (K) KPETFETAIK (E)           |
| 1341.663966                   | 1341.7274   | -0.063   |               | 8     | 18  | 2                | (K) LYRVEYAKSGR (A)          |
| 1365.658871                   |             |          |               |       |     |                  |                              |
| 1372.673976                   | 1372.7067   | -0.033   |               | 572   | 582 | 1                | (K) LQLEDDKENR (Y)           |
| 1377.723683                   | 1377.7485   | -0.025   |               | 866   | 878 | 0                | (R) TTNFAGILSQGLR (I)        |
| 1399.712268                   | 1399.7176   | -0.0053  |               | 270   | 282 | 0                | (K) QQVPSGESAILDR (V)        |
| 1399.7123                     | 1399.7427   | -0.030   |               | 444   | 456 | 0                | (R) EDLQLDKPASGVK (E)        |
| 1401.700508                   |             |          |               |       |     |                  |                              |
| 1475.753122                   |             |          |               |       |     |                  |                              |
| 1499.6966                     | 1499.8250   | -0.13    |               | 207   | 221 | 1                | (R) SILSPGGSCGPIKVK (T)      |
| 1499.696560                   | 1499.7125   | -0.016   |               | 66    | 78  | 0                | (R) HPDVEVDGFSCLR (W)        |
| 1593.767989                   | 1593.7981   | -0.030   | 1Met-ox       | 879   | 893 | 0                | (R) IAPPEAPVTGYMFGK (G)      |
| 1624.787880                   | 1624.8065   | -0.019   |               | 453   | 467 | 0                | (R) VVSEDFLQDVSASTK (S)      |
| 1643.8046                     | 1643.8500   | -0.045   |               | 703   | 717 | 0                | (R) TPTQTNGSNVFPKPR (G)      |
| 1646.809258                   |             |          |               |       |     |                  |                              |
| 1714.866711                   |             |          |               |       |     |                  |                              |
| 1753.823795                   | 1753.8755   | -0.052   |               | 168   | 182 | 0                | (R) EELGFRPEYSASQLK (G)      |
| 1964.934371                   | 1964.9092   | 0.025    | 2Met-ox       | 601   | 616 | 1                | (K) LEQMPSKEDIAEHFMK (L)     |
| 1988.990917                   | 1988.9672   | 0.024    |               | 529   | 548 | 0                | (K) GGAAVDPDSGLEHSAHVLEK (G) |
| 2023.960594                   | 2024.0196   | -0.059   |               | 166   | 182 | 1                | (K) NREELGFRPEYSASQLK (G)    |
| 2044.914146                   |             |          |               |       |     |                  |                              |
| 2365.088272                   |             |          |               |       |     |                  |                              |

## MS-Fit results lower band

19/32 matches (59%) **Red** Acc P23246 Splicing factor, proline- and glutamine-rich (Polypyrimidine tract-binding protein-associated-splicing factor)  
 Index: 197642 MW: 76150 Da (PTB-associated-splicing factor) (PSF)  
 pl: 9.5

| m/z Submitted Mass value [H+] | MH+ Matched | Delta Da | Modifications | Start | End | Missed Cleavages | Sequence                |
|-------------------------------|-------------|----------|---------------|-------|-----|------------------|-------------------------|
| 830.424266                    | 830.4479    | -0.024   |               | 543   | 548 | 1                | (R) QEELRR (M)          |
|                               | 830.4479    | -0.024   |               | 542   | 547 | 1                | (R) RQEELR (R)          |
| 1054.468566                   | 1054.4912   | -0.023   |               | 592   | 599 | 1                | (R) QREESYSR (M)        |
| 1143.611661                   | 1143.6269   | -0.015   |               | 366   | 376 | 0                | (R) FATHAALSVR (N)      |
| 1249.589893                   | 1249.6140   | -0.024   |               | 573   | 581 | 2                | (R) RREEMMIR (Q)        |
| 1252.600232                   | 1252.5409   | 0.059    | 1Met-ox       | 582   | 590 | 1                | (R) QREMEEQMR (R)       |
|                               | 1252.6208   | -0.021   |               | 320   | 330 | 0                | (K) YGEPGEVFINK (G)     |
| 1267.610030                   | 1267.6212   | -0.011   |               | 33    | 44  | 0                | (R) SPPPGMGLNQNR (G)    |
| 1283.622194                   | 1283.6161   | 0.0061   | 1Met-ox       | 33    | 44  | 0                | (R) SPPPGMGLNQNR (G)    |
| 1323.659926                   |             |          |               |       |     |                  |                         |
| 1341.635240                   | 1341.6658   | -0.031   |               | 667   | 681 | 0                | (R) FGQGGAGPVGGQGPR (G) |
| 1346.647216                   | 1346.6699   | -0.023   |               | 696   | 706 | 1                | (R) EEYEGPNKKPR (F)     |
| 1360.698201                   |             |          |               |       |     |                  |                         |
| 1363.665742                   | 1363.6271   | 0.039    | 1Met-ox       | 562   | 571 | 1                | (K) EMQLRQEER (R)       |

|             |           |         |         |     |     |   |                             |
|-------------|-----------|---------|---------|-----|-----|---|-----------------------------|
| 1403.718543 |           |         |         |     |     |   |                             |
| 1411.746169 |           |         |         |     |     |   |                             |
| 1454.748706 |           |         |         |     |     |   |                             |
| 1556.704490 | 1556.6767 | 0.028   |         | 600 | 611 | 2 | (R) MGYMDPRERDMR (M)        |
| 1559.762230 | 1559.7925 | -0.030  |         | 694 | 706 | 2 | (R) GREEYEGPNKKPR (F)       |
| 1572.716914 | 1572.6716 | 0.045   | 1Met-ox | 600 | 611 | 2 | (R)MGYMDPRERDMR(M)          |
|             | 1572.7257 | -0.0088 |         | 549 | 560 | 1 | (R) MEELHNQEMQKR (K)        |
|             | 1572.7257 | -0.0088 |         | 548 | 559 | 1 | (R) RMEELHNQEMQK (R)        |
| 1582.778789 |           |         |         |     |     |   |                             |
| 1588.722591 | 1588.6665 | 0.056   | 2Met-ox | 600 | 611 | 2 | (R)MGYMDPRERDMR(M)          |
|             | 1588.7206 | 0.0020  | 1Met-ox | 549 | 560 | 1 | (R)MEELHNQEMQKR(K)          |
|             | 1588.7206 | 0.0020  | 1Met-ox | 548 | 559 | 1 | (R)RMEELHNQEMQK(R)          |
| 1604.739875 | 1604.6614 | 0.078   | 3Met-ox | 600 | 611 | 2 | (R)MGYMDPRERDMR(M)          |
|             | 1604.7156 | 0.024   | 2Met-ox | 549 | 560 | 1 | (R)MEELHNQEMQKR(K)          |
|             | 1604.7156 | 0.024   | 2Met-ox | 548 | 559 | 1 | (R)RMEELHNQEMQK(R)          |
| 1707.755841 |           |         |         |     |     |   |                             |
| 1714.846394 |           |         |         |     |     |   |                             |
| 1716.789630 | 1716.8156 | -0.026  | 1Met-ox | 549 | 561 | 2 | (R)MEELHNQEMQKR(E)          |
| 1762.730564 | 1762.7820 | -0.051  |         | 480 | 493 | 0 | (R) FAQHGTFEYEQSR (W)       |
| 1782.888574 |           |         |         |     |     |   |                             |
| 1802.868196 |           |         |         |     |     |   |                             |
| 1963.927906 | 1964.0124 | -0.084  |         | 299 | 315 | 1 | (R) LFGVNLPADETEDEFKR (L)   |
| 2388.932675 |           |         |         |     |     |   |                             |
| 2403.078269 | 2403.1351 | -0.057  |         | 246 | 267 | 0 | (R) QHHPYHQHHQGGPPGGPGR (S) |
| 2445.125349 |           |         |         |     |     |   |                             |
| 3313.190951 |           |         |         |     |     |   |                             |
